# Supplementary material
Source: PubMed Central journal article supplement (PMC8073242)
Supplement: NIHMS1693788-supplement-Supp_1.pdf [file NIHMS1693788-supplement-Supp_1.pdf]

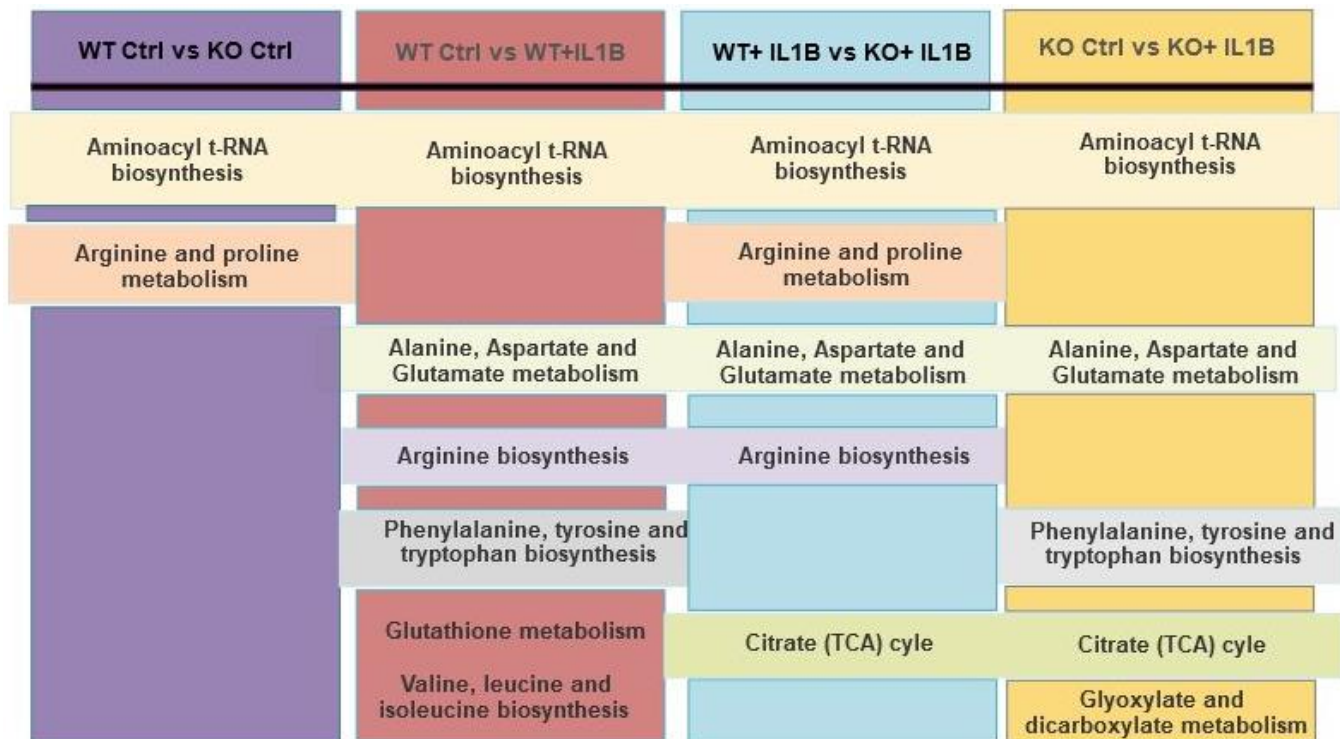

**Supplementary Figure 2: Pathway analysis for the differentially regulated metabolites shown in Figure 2**

Shown are comparisons between WT ctrl to *Glx*<sup>-/-</sup> ctrl, WT ctrl to WT+IL1B, WT+IL1B to *Glx*<sup>-/-</sup> +IL1B and *Glx*<sup>-/-</sup> ctrl to *Glx*<sup>-/-</sup> +IL1B groups. Metaboanalyst was used to generate the list with FDR value of < 0.05 as the cutoff.
