# Supplementary material
Source: PubMed Central journal article supplement (PMC8073242)
Supplement: NIHMS1693788-supplement-Supp_2.pdf [file NIHMS1693788-supplement-Supp_2.pdf]

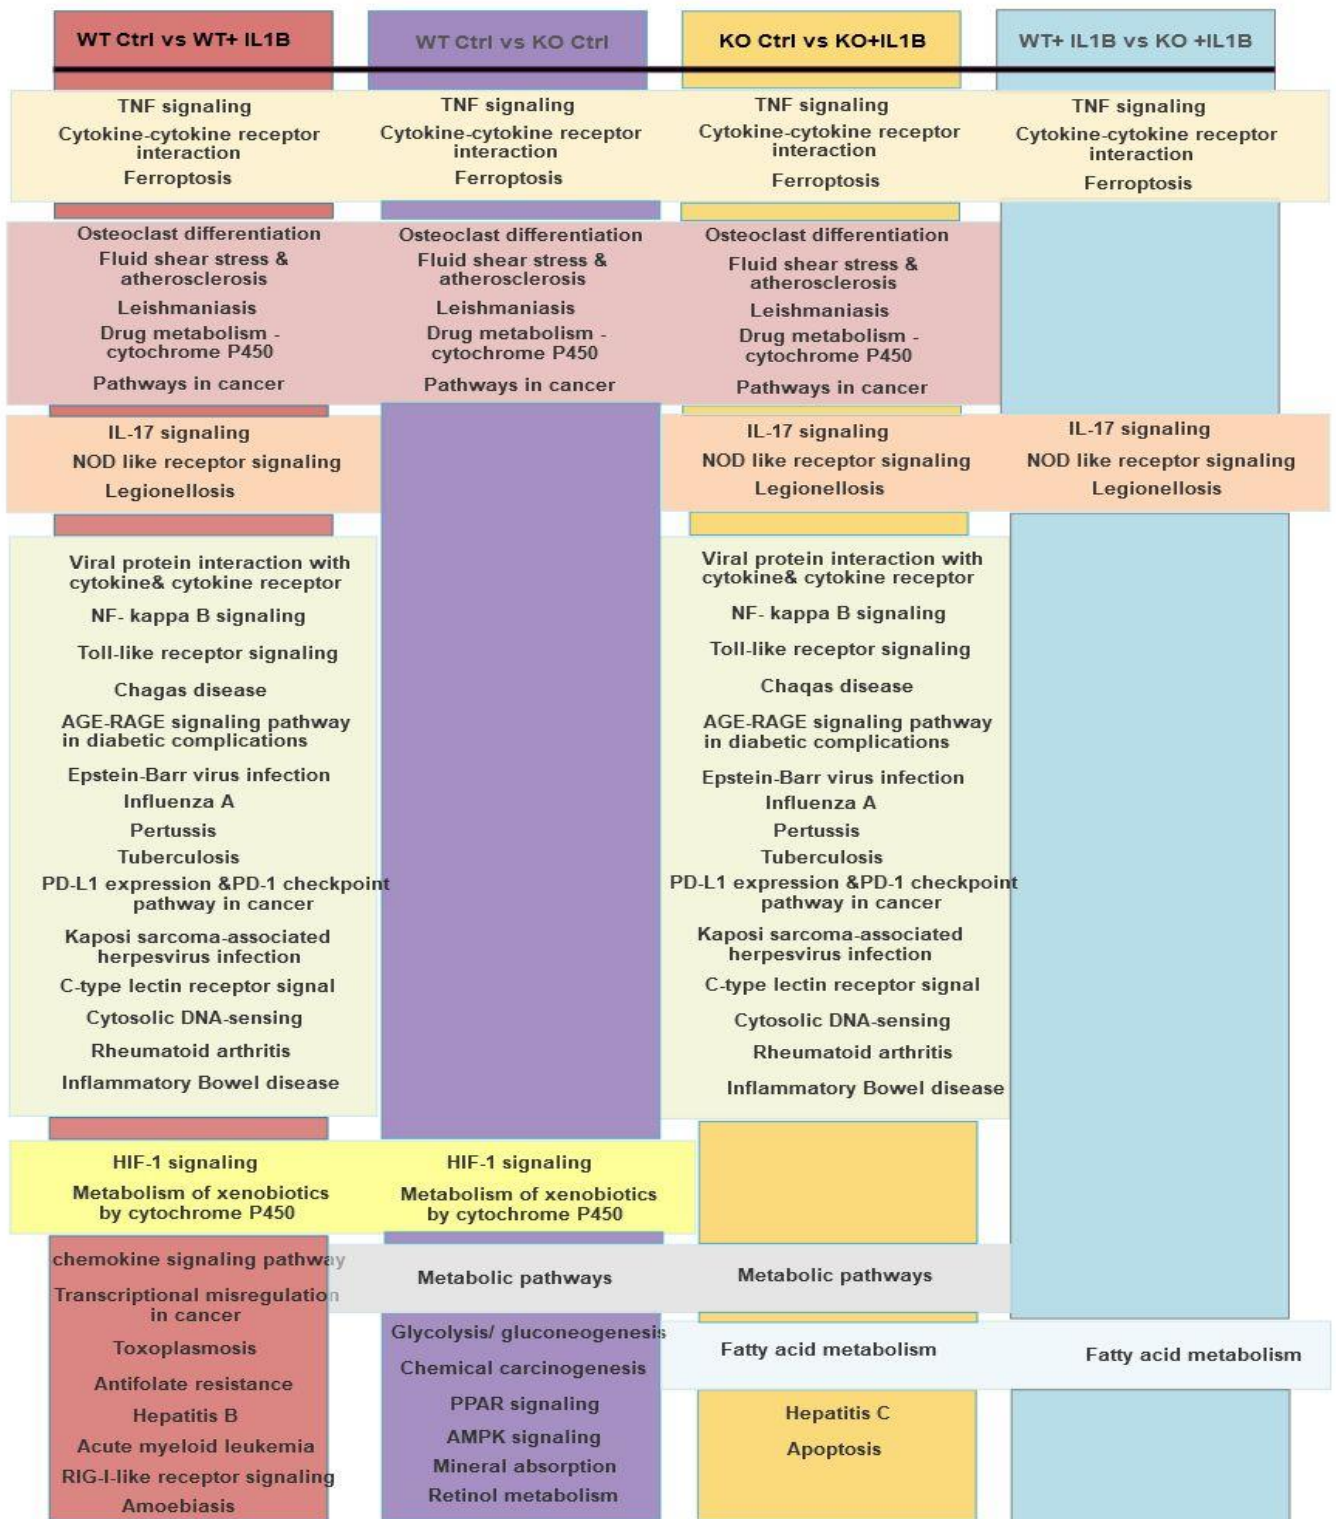

**Supplementary Figure 3: KEGG pathway analysis for the differentially regulated genes shown in Figure 3**

Shown are comparisons between WT ctrl to *Glx<sup>-/-</sup>* ctrl, WT ctrl to WT+IL1B, WT+IL1B to *Glx<sup>-/-</sup>*+IL1B and *Glx<sup>-/-</sup>* ctrl to *Glx<sup>-/-</sup>*+IL1B groups. Log fold change of 1 was chosen as a cut off value for genes included in the analysis.
