# Supplementary material
Source: PubMed Central journal article supplement (PMC8073242)
Supplement: NIHMS1693788-supplement-Supp_3.pdf [file NIHMS1693788-supplement-Supp_3.pdf]

# Supplementary figure 1:

A.

## List of glutathionylated proteins

| WT Ctrl                                                                                                                                                                                                                                                                                                                                                                                                                                                                                                                                                                                                                                                                                                                                                                                                                                                                                                                                                                                                                                                                                                                                                                                                                                                                                                                                                                                                                                                                                       | WT+ IL1B                                                                                                                                                                                                                                                                                                                                                                                                                                                                                                                                                                                                                                                                                                                                                                                                                                                                                                                                                                                                                                                                                                                                                                                                                                                                                                                                                                                                                                                                                                                                                                                                                                                                                                                                                                                                                                                                                                                                                                                        | Glrx KO Ctrl                                                                                                                                                                                                                                                                                                                                                                                                                                                                                                                                                                                                                                                                                                                                                                                                                                                                                                                                                                                                                                                                                                                                                                                                                                                                                                                                                                                                                                                                                                                                                                                                                                                                                                                                                                                                                                                                                                                                                                                     | Glrx KO+ IL1B                                                                                                                                                                                                                                                                                                                                                                                                                                                                                                                                                                                                                                                                                                                                                                                                                                                                                                                                                                                                                                                                                                                                                                                                                                                                                                                                                                                                                                                                                                                                |
|-----------------------------------------------------------------------------------------------------------------------------------------------------------------------------------------------------------------------------------------------------------------------------------------------------------------------------------------------------------------------------------------------------------------------------------------------------------------------------------------------------------------------------------------------------------------------------------------------------------------------------------------------------------------------------------------------------------------------------------------------------------------------------------------------------------------------------------------------------------------------------------------------------------------------------------------------------------------------------------------------------------------------------------------------------------------------------------------------------------------------------------------------------------------------------------------------------------------------------------------------------------------------------------------------------------------------------------------------------------------------------------------------------------------------------------------------------------------------------------------------|-------------------------------------------------------------------------------------------------------------------------------------------------------------------------------------------------------------------------------------------------------------------------------------------------------------------------------------------------------------------------------------------------------------------------------------------------------------------------------------------------------------------------------------------------------------------------------------------------------------------------------------------------------------------------------------------------------------------------------------------------------------------------------------------------------------------------------------------------------------------------------------------------------------------------------------------------------------------------------------------------------------------------------------------------------------------------------------------------------------------------------------------------------------------------------------------------------------------------------------------------------------------------------------------------------------------------------------------------------------------------------------------------------------------------------------------------------------------------------------------------------------------------------------------------------------------------------------------------------------------------------------------------------------------------------------------------------------------------------------------------------------------------------------------------------------------------------------------------------------------------------------------------------------------------------------------------------------------------------------------------|--------------------------------------------------------------------------------------------------------------------------------------------------------------------------------------------------------------------------------------------------------------------------------------------------------------------------------------------------------------------------------------------------------------------------------------------------------------------------------------------------------------------------------------------------------------------------------------------------------------------------------------------------------------------------------------------------------------------------------------------------------------------------------------------------------------------------------------------------------------------------------------------------------------------------------------------------------------------------------------------------------------------------------------------------------------------------------------------------------------------------------------------------------------------------------------------------------------------------------------------------------------------------------------------------------------------------------------------------------------------------------------------------------------------------------------------------------------------------------------------------------------------------------------------------------------------------------------------------------------------------------------------------------------------------------------------------------------------------------------------------------------------------------------------------------------------------------------------------------------------------------------------------------------------------------------------------------------------------------------------------|----------------------------------------------------------------------------------------------------------------------------------------------------------------------------------------------------------------------------------------------------------------------------------------------------------------------------------------------------------------------------------------------------------------------------------------------------------------------------------------------------------------------------------------------------------------------------------------------------------------------------------------------------------------------------------------------------------------------------------------------------------------------------------------------------------------------------------------------------------------------------------------------------------------------------------------------------------------------------------------------------------------------------------------------------------------------------------------------------------------------------------------------------------------------------------------------------------------------------------------------------------------------------------------------------------------------------------------------------------------------------------------------------------------------------------------------------------------------------------------------------------------------------------------------|
| <p><b>MYH14, ANXA6, LGALS3, DLD,</b><br/>           TUBA1B, PLS3,<br/>           UBE2L3, GNB2,<br/>           KRT79, MYO1D,<br/>           SELENBP1,<br/>           GSTO1, <b>GLRX,</b><br/>           ACTB, PKM,<br/>           GAPDH, ANXA1,<br/>           ANXA2, EEF1A1,<br/>           MYH9, ENO1,<br/>           TKT, CBR2, LDHA,<br/>           CYP2F2,<br/>           ALDH1A1,<br/>           VCP, PGD, PGK1,<br/>           ALDH3A1, PRDX1,<br/>           MDH2, PRSS1,<br/>           TPI1, ESD, KRT1,<br/>           KRT10, EEF2,<br/>           FLNB, KRT78,<br/>           ALDOA,<br/>           HSP90AB1,<br/>           EEF1G, ETFB,<br/>           PCBP1, GSTM2,<br/>           ALB, KXD1, SFN,<br/>           PPIA, CSTB,<br/>           RPLP0, CLIC1,<br/>           RNH11, FLNA,<br/>           ERO1A, CAST,<br/>           VDAC3, FASN, CS,<br/>           YWHAG, YWHAQ,<br/>           HNRNPU, IDH1,<br/>           HNRNPM, RPL12,<br/>           ANXA4, KRT5,<br/>           CTNND1, WDR1,<br/>           HNRNPK,<br/>           TAGLN2, CCT4,<br/>           PGAM1, S100A6,<br/>           CLTC, DSTN, GSN,<br/>           SEPTIN-9,<br/>           ATP5A1, KRT2,<br/>           IMMT, SQOR,<br/>           PRDX6, SLC25A5,<br/>           OTUB1, TUBB5,<br/>           VILL, IDH2, CAP1,<br/>           GPD2, AHNAK,<br/>           MYOF, PYGB,<br/>           ATP1A1, KRT76,<br/>           GSTP1, GSTM1,<br/>           GOT2, AHSA1,<br/>           ETFA, PCBP2</p> | <p><b>TUBA1C, ALDH1A7, CFL1, LDHB, ACTN4, PRDX5, RHOA, RPSA, VWA5A, ACADL, ARF3, GNAI2, MAT2A, ADSS, RPS4X, GM20390, TPT1, GM10036, SERPINB5, ARF5, CORO1B, CKMT1, RPL30, ANXA3, S100A10, PEF1, TPM4, IPO5, DDB1, BPNT1, RAN, DARS, FAM129A, RPS3, RPS12, CTSC, CORO1C, ATP5O, GLUD1, HSPA8, AHCY, SARG, HNRNPAB, UBE2D3, CTSB, PIR, KHDRBS1, RPS14, EPRS, EIF3G, DLST, CNDP2, PAICS, IL1RN, JUP, SND1, HSPA5, MAP4, POR, DNPEP, STRN, RPS3A, CMAS, HMGCS1, SLC9A3R1, PDLIM1, PIGR, AFDN, VASP, S100A14, ATP5G2, RPL23, NEDD4, FABP5, HNRNPD, SERPINB9, GM5786, RBM25, RPI7A-PS3, SDHA, HSPD1, PSMD4, SERBP1, LTF, IQGAP1, YWHAZ, PSMA6, ACTN1, ALDH2, RPS5, S100A11, CAPG, PFN1, RAB10, MTAP, EIF5A, NAP1L1, GARS, TXNL1, GFPT1, NAXE, ATXN2L, UBE2N, NDRG1, GANAB, PPP2R1A, RPS16, NT5C2, CCT7, CDC42, DHX9, SH3BGR13, UQCRC1, ATP2A2, DYNLL1, ACLY, CAPN1, P4HB, TGM2, UBA1, DCXR, RACK1, CALR, PREP, MDH1, VDAC1, LRRFIP1, MYL6, FAM129B, VDAC2, CCT8, RHOC, PHGDH, S100A16, PDIA3, TRY5, G6PDX, HADHA, SLC25A3, GCLC, PRDX2, CCT5, HSPA9, HNRNPL, ME1, TALDO1, CNN3, CCT6A, COPB1, GPI, CLIC4, CCT3, EPHX1, RAB7A, KPNB1, HSP90AA1, TUBB4B, KRT73, TXN, EIF2S1, PEBP1, ACO2, HNRNPF, TCP1, KRT14, PFKL, TPM3, HDGF, CAPZB, ARF6, RPS20, PDCD6IP, ACAA2, CAPN2, PSMD2, NPM1, CTSD, DBNL, HK1, ACTR3, GSTP1, GDI2, RALY, HNRNPA3, ARPC1B, SELENBP1, GSTO1, <b>GLRX,</b> ACTB, PKM, GAPDH, ANXA1, ANXA2, EEF1A1, MYH9, ENO1, TKT, CBR2, LDHA, CYP2F2, ALDH1A1, VCP, PGD, PGK1, ALDH3A1, PRDX1, MDH2, PRSS1, TPI1, ESD, KRT1, KRT10, EEF2, FLNB, KRT78, ALDOA, HSP90AB1, EEF1G, ETFB, PCBP1, GSTM2, ALB, KXD1, SFN, PPIA, CSTB, RPLP0, CLIC1, RNH1, FLNA, ERO1A, CAST, VDAC3, FASN, CS, YWHAG, YWHAQ, HNRNPU, IDH1, HNRNPM, RPL12, ANXA4, KRT5, CTNND1, WDR1, HNRNPK, TAGLN2, CCT4, PGAM1, S100A6, CLTC, DSTN, GSN, SEPTIN-9, ATP5A1, KRT2, IMMT, SQOR, PRDX6, SLC25A5, OTUB1, TUBB5, VILL, IDH2, CAP1, GPD2, AHNAK, MYOF, PYGB, ATP1A1, KRT76, GSTP1, GSTM1, GOT2, AHSA1, ETFA, PCBP2</b></p> | <p><b>ACTC1, NIPSNAP3A, EIF4B, LTA4H, ESPN, LASP1, CTNNA1, ERP44, NME1,</b><br/>           CTSH, PARK7, CTNNB1,<br/>           PSMD1, HIST2H3C1, P4HB,<br/>           TGM2, UBA1, DCXR,<br/>           RACK1, CALR, PREP,<br/>           MDH1, VDAC1, LRRFIP1,<br/>           MYL6, FAM129B, VDAC2,<br/>           CCT8, RHOC, PHGDH,<br/>           S100A16, PDIA3, TRY5,<br/>           G6PDX, HADHA, SLC25A3,<br/>           GCLC, PRDX2, CCT5,<br/>           HSPA9, HNRNPL, ME1,<br/>           TALDO1, CNN3, CCT6A,<br/>           COPB1, GPI, CLIC4, CCT3,<br/>           EPHX1, RAB7A, KPNB1,<br/>           HSP90AA1, TUBB4B,<br/>           KRT73, TXN, EIF2S1,<br/>           PEBP1, ACO2, HNRNPF,<br/>           TCP1, KRT14, PFKL, TPM3,<br/>           HDGF, CAPZB, ARF6,<br/>           RPS20, PDCD6IP, ACAA2,<br/>           CAPN2, PSMD2, NPM1,<br/>           CTSD, DBNL, HK1, ACTR3,<br/>           GSTP1, GDI2, RALY,<br/>           HNRNPA3, ARPC1B,<br/>           TUBA1B, PLS3, UBE2L3,<br/>           GNB2, KRT79, MYO1D,<br/>           SELENBP1, GSTO1, <b>GLRX,</b><br/>           ACTB, PKM, GAPDH,<br/>           ANXA1, ANXA2, EEF1A1,<br/>           MYH9, ENO1, TKT, CBR2,<br/>           LDHA, CYP2F2, ALDH1A1,<br/>           VCP, PGD, PGK1,<br/>           ALDH3A1, PRDX1, MDH2,<br/>           PRSS1, TPI1, ESD, KRT1,<br/>           KRT10, EEF2, FLNB, KRT78,<br/>           ALDOA, HSP90AB1, EEF1G,<br/>           ETFB, PCBP1, GSTM2, ALB,<br/>           KXD1, SFN, PPIA, CSTB,<br/>           RPLP0, CLIC1, RNH1, FLNA,<br/>           ERO1A, CAST, VDAC3,<br/>           FASN, CS, YWHAG,<br/>           YWHAQ, HNRNPU, IDH1,<br/>           HNRNPM, RPL12, ANXA4,<br/>           KRT5, CTNND1, WDR1,<br/>           HNRNPK, TAGLN2, CCT4,<br/>           PGAM1, S100A6, CLTC,<br/>           DSTN, GSN, SEPTIN-9,<br/>           ATP5A1, KRT2, IMMT,<br/>           SQOR, AHNAK, MYOF,<br/>           PYGB, ATP1A1, KRT76,<br/>           GSTP1</p> | <p><b>CNN2, DNM2, PPP1CC, PCLO, MIER1, USP14, OGDH, MYO1C, HNRNPC, CCT2, PPP2CB, BAG3, XPO1, RPL5, LMNB1, AP2M1, SEC24C, RBBP4, NARS,</b> LTF, IQGAP1, YWHAZ, PSMA6, ACTN1, ALDH2, RPS5, S100A11, CAPG, PFN1, RAB10, MTAP, EIF5A, NAP1L1, GARS, TXNL1, GFPT1, NAXE, ATXN2L, UBE2N, NDRG1, GANAB, PPP2R1A, RPS16, NT5C2, CCT7, CDC42, DHX9, SH3BGR13, UQCRC1, ATP2A2, DYNLL1, ACLY, CAPN1, PRDX5, SLC25A5, OTUB1, TUBB5, VILL, IDH2, CAP1, GPD2, CTSH, PARK7, CTNNB1, PSMD1, HIST2H3C1, KRT79, MYO1D, P4HB, TGM2, UBA1, DCXR, RACK1, CALR, PREP, MDH1, VDAC1, LRRFIP1, MYL6, FAM129B, VDAC2, CCT8, RHOC, PHGDH, S100A16, PDIA3, TRY5, G6PDX, HADHA, SLC25A3, GCLC, PRDX2, CCT5, HSPA9, HNRNPL, ME1, TALDO1, CNN3, CCT6A, COPB1, GPI, CLIC4, CCT3, EPHX1, RAB7A, KPNB1, HSP90AA1, TUBB4B, KRT73, TXN, EIF2S1, PEBP1, ACO2, HNRNPF, TCP1, KRT14, PFKL, TPM3, HDGF, CAPZB, ARF6, RPS20, PDCD6IP, ACAA2, CAPN2, PSMD2, NPM1, CTSD, DBNL, HK1, ACTR3, GSTP1, GDI2, RALY, HNRNPA3, ARPC1B, TUBA1B, PLS3, UBE2L3, GNB2, KRT79, MYO1D, SELENBP1, GSTO1, <b>GLRX,</b> ACTB, PKM, GAPDH, ANXA1, ANXA2, EEF1A1, MYH9, ENO1, TKT, CBR2, LDHA, CYP2F2, ALDH1A1, VCP, PGD, PGK1, ALDH3A1, PRDX1, MDH2, PRSS1, TPI1, ESD, KRT1, KRT10, EEF2, FLNB, KRT78, ALDOA, HSP90AB1, EEF1G, ETFB, PCBP1, GSTM2, ALB, KXD1, SFN, PPIA, CSTB, RPLP0, CLIC1, RNH1, FLNA, ERO1A, CAST, VDAC3, FASN, CS, YWHAG, YWHAQ, HNRNPU, IDH1, HNRNPM, RPL12, ANXA4, KRT5, CTNND1, WDR1, HNRNPK, TAGLN2, CCT4, PGAM1, S100A6, CLTC, DSTN, GSN, SEPTIN-9, ATP5A1, KRT2, IMMT, SQOR</p> |

## B. Metabolic pathways

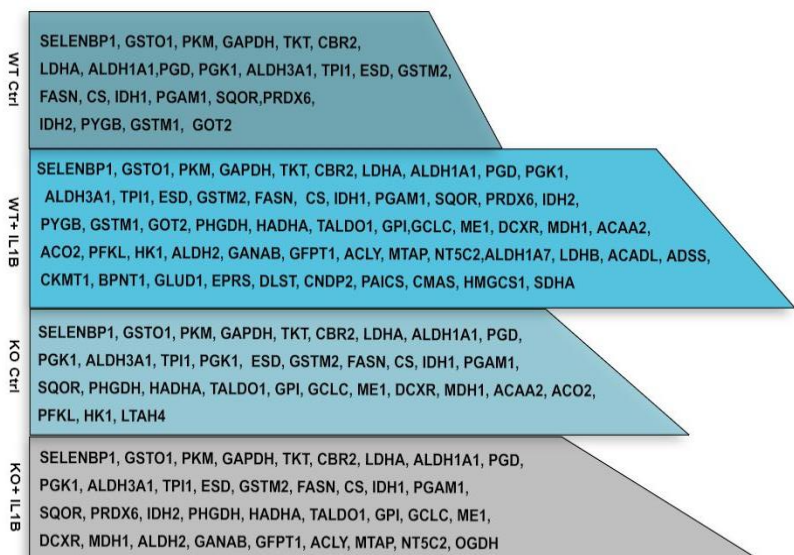

## Glycolysis/ gluconeogenesis

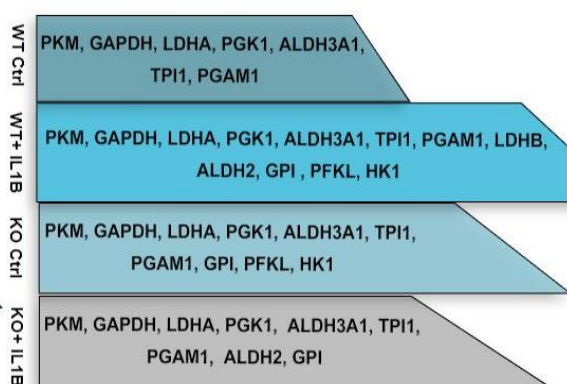

## Carbon metabolism

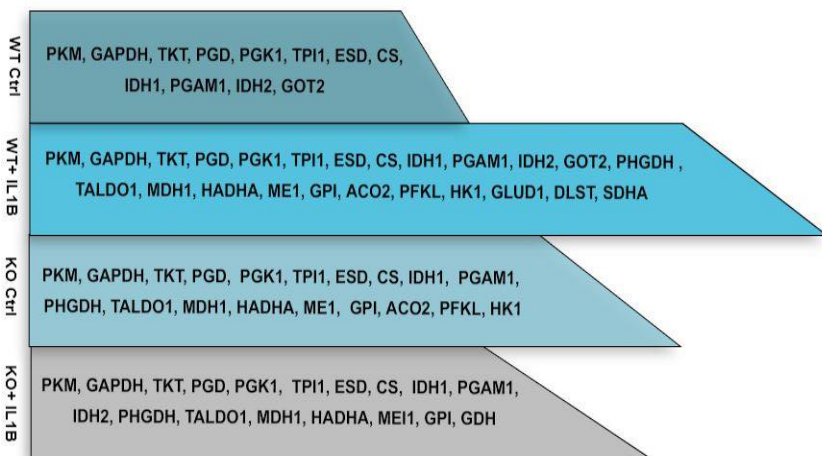

## TCA cycle

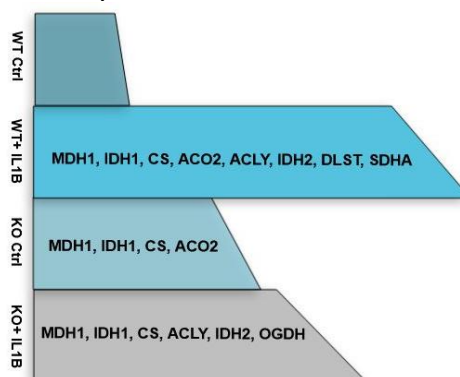

## Supplementary Figure 1: S-glutathionylated proteins identified via redox-proteomic analysis of WT or *Glx*<sup>-/-</sup> airway basal cells under baseline conditions or in response to stimulation with IL1B

**A:** Glutathionylated proteins appearing in control or IL1B-stimulated WT or *Glx*<sup>-/-</sup> airway basal cells. Unique proteins detected in each group are in bold and underlined. Exogenously added GLRX identified in the four groups is highlighted in red. **B:** Identity of glutathionylated proteins hits appearing in select KEGG pathways identified in Figure 1C in each of the four treatment groups.
