# Supplementary material
Source: PubMed Central journal article supplement (PMC8073242)
Supplement: NIHMS1693788-supplement-Supp_4.pdf [file NIHMS1693788-supplement-Supp_4.pdf]

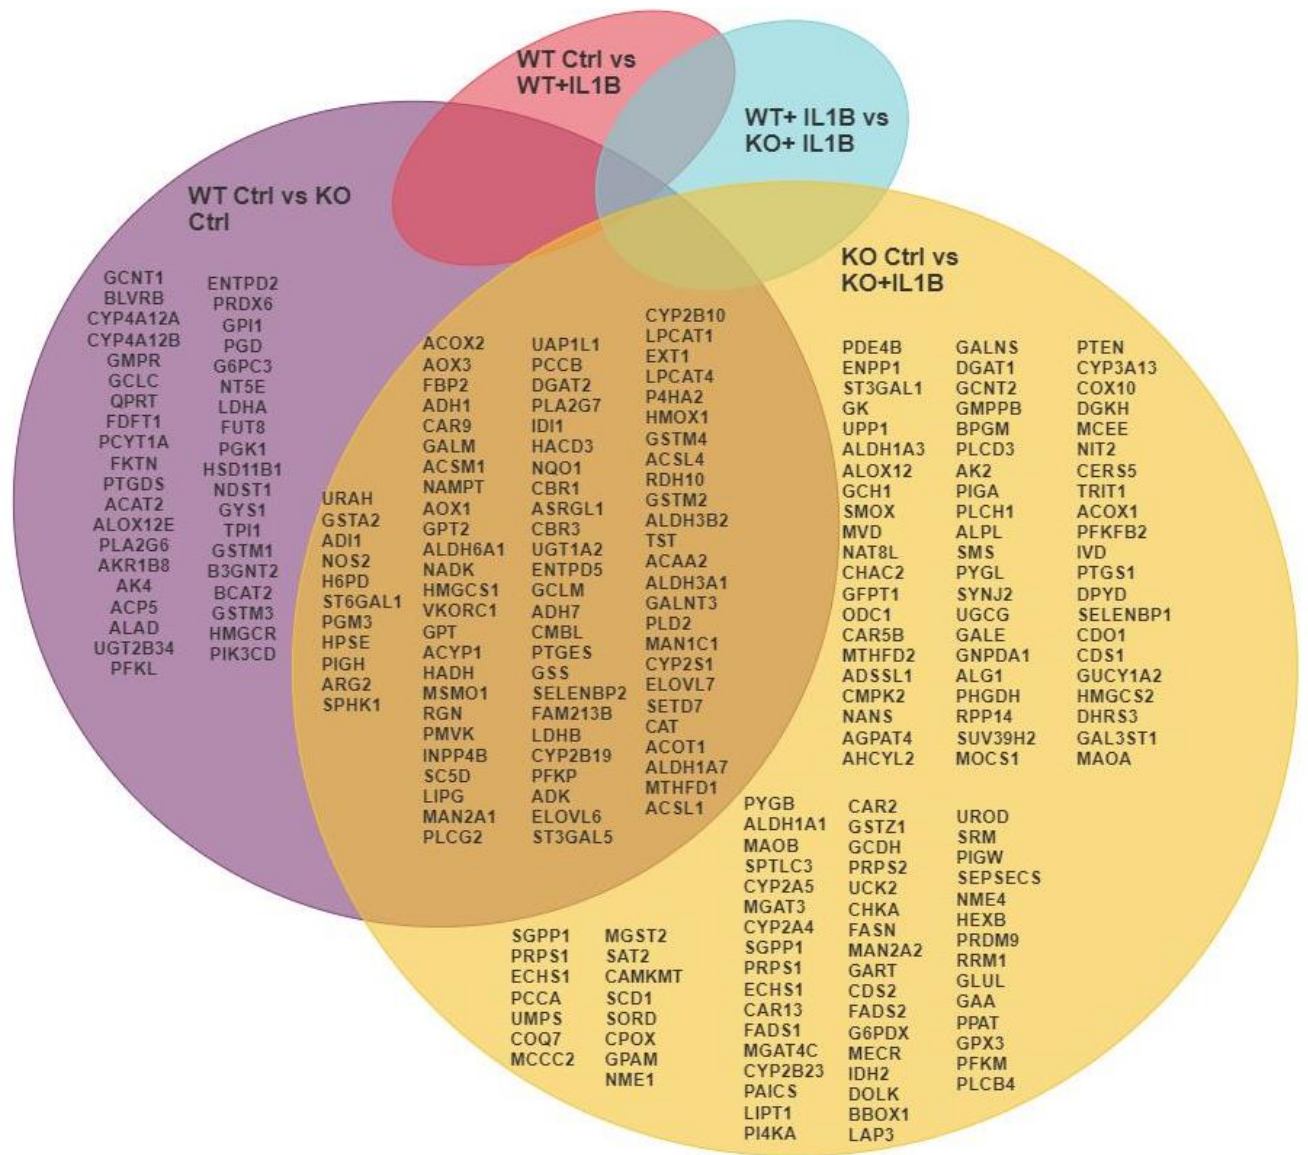

**Supplementary Figure 4:** Venn diagrams highlighting unique and overlapping genes in the metabolic pathways identified from KEGG analysis shown in Supplementary Figure 3.
