# Supplementary material
Source: PubMed Central journal article supplement (PMC8073242)
Supplement: NIHMS1693788-supplement-Supp_5.pdf [file NIHMS1693788-supplement-Supp_5.pdf]

# Supplementary Figure 5:

A.

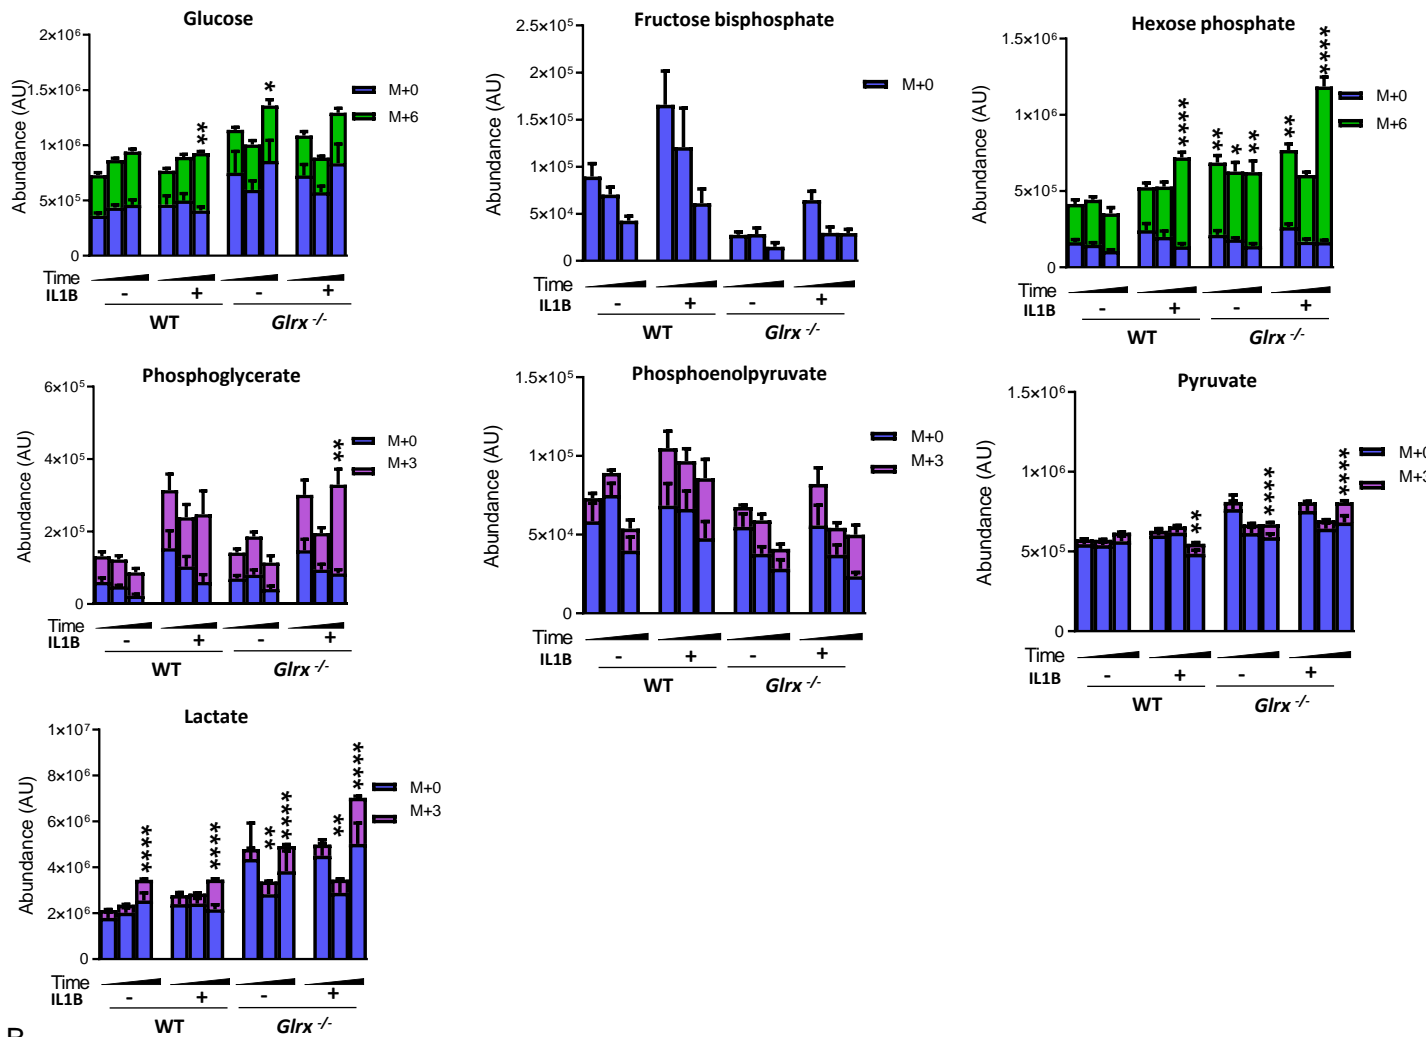

B.

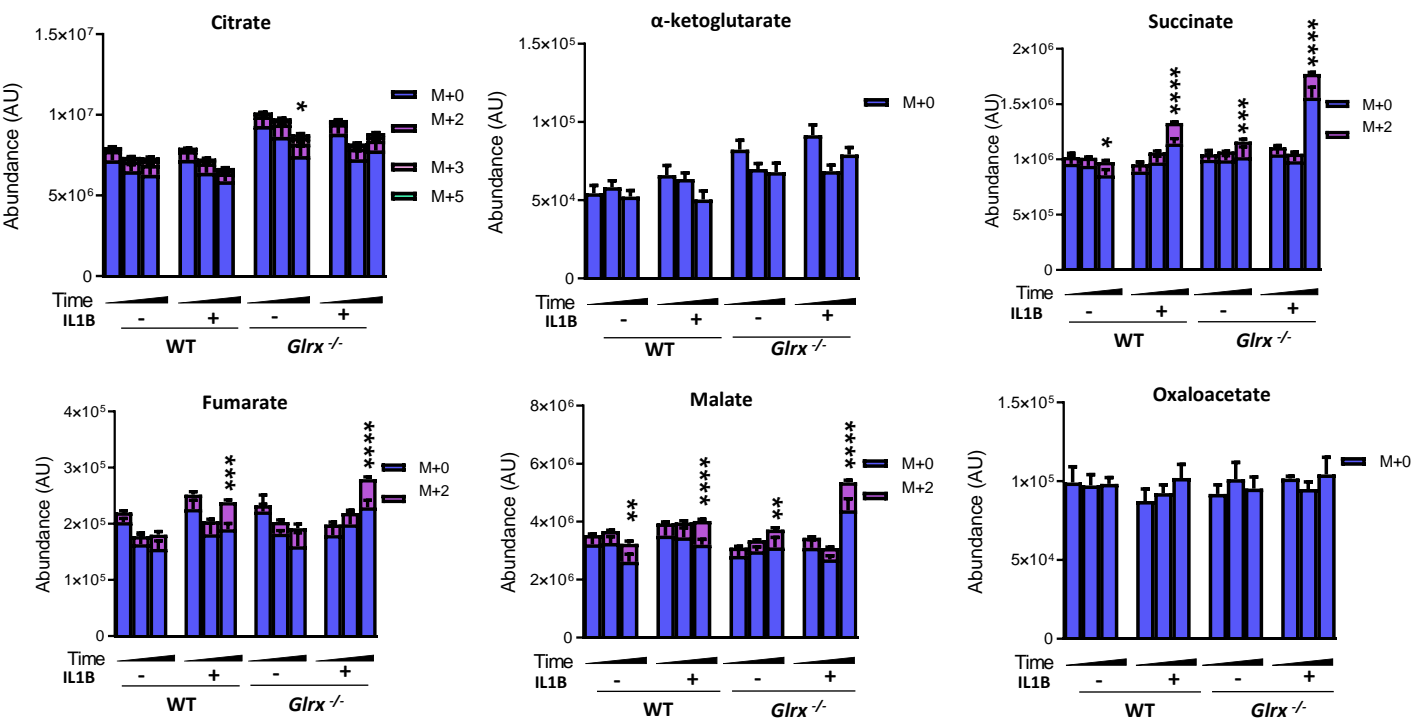

### Supplementary Figure 5:

$^{13}\text{C}$  carbon tracing metabolites from epithelial cells treated with IL1B for 2 (left), 6 (middle) and 24 (right) hours. M+0 depicts the unlabeled, while M+2, 3, 5 and 6 depict the labeled portion of the metabolites in the glycolysis pathway (**A**) and the TCA cycle (**B**). \* $p < 0.05$ , \*\*  $p < 0.01$  \*\*\*  $p < 0.001$ , \*\*\*\*  $p < 0.0001$  (ANOVA). Statistical analyses in this represent only the heavy portion of the metabolites. All groups were compared to WT control at 2 hours.
